# Supplementary material for: Estimating heritability and its enrichment in tissue-specific gene sets in admixed populations
Source: PubMed Central journal article supplement — Hum Mol Genet. 2021 May 13;30(16):1521–34. doi: 10.1093/hmg/ddab130 (PMC8330913; doi:10.1093/hmg/ddab130), 2021-05-13
Supplement: luo_li_hmg-2021-ce-00137_supp_note_ddab130.pdf [file luo_li_hmg-2021-ce-00137_supp_note_ddab130.pdf]

## The SIGMA Type 2 Diabetes Genetics Consortium

**Genetic analyses:** Josep M. Mercader<sup>1,2,3</sup>, Alicia Huerta-Chagoya<sup>4</sup>, Humberto García-Ortiz<sup>5</sup>, Hortensia Moreno-Macías<sup>4,6</sup>, Alisa Manning<sup>3,7,8</sup>, Lizz Caulkins<sup>3</sup>, Noël P. Burt<sup>3</sup>, Jason Flannick<sup>3,9</sup>, Nick Patterson<sup>10</sup>, Carlos A. Aguilar-Salinas<sup>4</sup>, Teresa Tusié-Luna<sup>4,11</sup>, David Altshuler<sup>3,9,12</sup>, Jose C. Florez<sup>1,3,8,13</sup>

### Study cohorts:

*Diabetes in Mexico Study:* Humberto García-Ortiz<sup>5</sup>, Angélica Martínez-Hernández<sup>5</sup>, Federico Centeno-Cruz<sup>5</sup>, Francisco Martin Barajas-Olmos<sup>5</sup>, Carlos Zerrweck<sup>14</sup>, Cecilia Contreras-Cubas<sup>5</sup>, Elvia Mendoza-Caamal<sup>5</sup>, Cristina Revilla-Monsalve<sup>15</sup>, Sergio Islas-Andrade<sup>15</sup>, Emilio Córdova<sup>5</sup>, Xavier Soberón<sup>5</sup>, Lorena Orozco<sup>5</sup>

*Mexico City Diabetes Study:* Clicerio González-Villalpando<sup>16</sup>, María Elena González-Villalpando<sup>16</sup>

*Multiethnic Cohort Study:* Christopher A. Haiman<sup>17</sup>, Lynne Wilkens<sup>18</sup>, Loic Le Marchand<sup>18</sup>, Kristine Monroe<sup>17</sup>, Laurence Kolonel<sup>18</sup>

*UNAM/INCMNSZ Diabetes Study:* Olimpia Arellano-Campos<sup>4</sup>, Alicia Huerta-Chagoya<sup>4</sup>, Maria L. Ordóñez-Sánchez<sup>4</sup>, Maribel Rodríguez-Torres<sup>4</sup>, Yayoi Segura-Kato<sup>4</sup>, Rosario Rodríguez-Guillén<sup>4</sup>, Ivette Cruz-Bautista<sup>4</sup>, Linda Liliana Muñoz-Hernandez<sup>4</sup>, Tamara Sáenz<sup>4</sup>, Donají Gómez<sup>4</sup>, Ulices Alvirde<sup>4</sup>, Paloma Almeda-Valdés<sup>4</sup>, Hortensia Moreno-Macías<sup>4,6</sup>, Teresa Tusié-Luna<sup>4,11</sup>, Carlos A. Aguilar-Salinas<sup>4</sup>

**Scientific and project management:** Noël P. Burt<sup>3</sup>, Lizz Caulkins<sup>3</sup>, Maria L. Cortes<sup>10</sup>

**Steering committee:** David Altshuler<sup>3,9,12</sup>, Jose C. Florez<sup>1,3,8,13</sup>, Christopher A. Haiman<sup>17</sup>, Carlos A. Aguilar-Salinas<sup>4</sup>, Clicerio González-Villalpando<sup>16</sup>, Lorena Orozco<sup>5</sup>, Teresa Tusié-Luna<sup>4,11</sup>

<sup>1</sup> Diabetes Unit and Center for Human Genetic Research, Massachusetts General Hospital, Boston, Massachusetts, 02114, USA.

<sup>2</sup> Joint BSC-CRG-IRB Research Program in Computational Biology. Barcelona Supercomputing Center, 08034 Barcelona.

<sup>3</sup> Program in Medical and Population Genetics, Broad Institute of Harvard and MIT, Cambridge, Massachusetts, 02142, USA.

<sup>4</sup> Instituto Nacional de Ciencias Médicas y Nutrición Salvador Zubirán, Sección XVI, Tlalpan, 14000 Mexico City, Mexico.

<sup>5</sup> Instituto Nacional de Medicina Genómica, Tlalpan, 14610, Mexico City, Mexico.

<sup>6</sup> Universidad Autónoma Metropolitana, Tlalpan 14387, Mexico City, Mexico.

<sup>7</sup> Center for Human Genetic Research, Massachusetts General Hospital, Boston, Massachusetts, 02114, USA.

<sup>8</sup> Department of Medicine, Harvard Medical School, Boston, Massachusetts, USA.

<sup>9</sup> Department of Molecular Biology, Massachusetts General Hospital, Boston, Massachusetts, 02114, USA.

<sup>10</sup> Broad Institute of Harvard and MIT, Cambridge, Massachusetts, 02142, USA.

<sup>11</sup> Instituto de Investigaciones Biomédicas, UNAM Unidad de Biología Molecular y Medicina Genómica, UNAM/INCMNSZ, Coyoacán, 04510 Mexico City, Mexico.

<sup>12</sup> Department of Genetics, Harvard Medical School, Boston, Massachusetts, 02115, USA.

<sup>13</sup> Metabolism Program, Broad Institute of Harvard and MIT, Cambridge, Massachusetts, 02142, USA.

<sup>14</sup> Clínica de Integral de Cirugía para la Obesidad y Enfermedades Metabólicas, Hospital General Tláhuac, Secretaría de Salud del GDF. México City.

<sup>15</sup> Instituto Mexicano del Seguro Social SXXI, Mexico City, Mexico.

<sup>16</sup> Centro de Estudios en Diabetes, Unidad de Investigación en Diabetes y Riesgo Cardiovascular, Centro de Investigación en Salud Poblacional, Instituto Nacional de Salud Pública, Mexico City, Mexico.

<sup>17</sup> Department of Preventive Medicine, Keck School of Medicine, University of Southern California, Los Angeles, California, 90033, USA.

<sup>18</sup> Epidemiology Program, University of Hawaii Cancer Center, Honolulu, Hawaii, USA.
